# Supplementary material
Source: publisher site journal article supplement (https://www.dovepress.com/article/490484)
Supplement: Supplementary file 1 [file get_supplementary_file.php]

**Table S1 qPCR primer sequences and ATP1A3 interference sequences**

| Gene | Forward Primer (5′–3′) | Reverse Primer (5′–3′) |
| --- | --- | --- |
| ATP1A3 | TGACCTGCGGGATCATCTCAG | GAGTCTGGGGGCTCGGATTC |
| GAPDH | GGAGCGAGATCCCTCCAAAAT | GGCTGTTGTCATACTTCTCATGG |
| NC | UUCUCCGAACGUGUCACGU | ACGUGACAGGUUCGGAGAA |
| Si-ATP1A3-1 | CGGACAAGAAAGAUGACAAGG | UUGUCAUCUUUCUUGUCCGUG |
| Si-ATP1A3-2 | GCGACAUCAUGAAGAGACAGC | UGUCUCUUCAUGAUGUCGCUU |
| Si-ATP1A3-3 | CCGACUGCACUCACGACAACC | UUGUCGUGAGUGCAGUCGGGA |
